# Supplementary material for: A Mobile App to Provide Evidence-Based Information About Crystal Methamphetamine (Ice) to the Community (Cracks in the Ice): Co-Design and Beta Testing
Source: PubMed Central journal article supplement (PMC6320422; doi:10.2196/11107), 2018-12-20
Supplement: mhealth_v6i12e11107_app2.pdf [file mhealth_v6i12e11107_app2.pdf]

## Multimedia Appendix 2

Example suggestions for improvement from end users about the app beta version

| Area of improvement                                   | Example feedback                                                                                                                                                                                                                                                                                                                                                                                                      |
|-------------------------------------------------------|-----------------------------------------------------------------------------------------------------------------------------------------------------------------------------------------------------------------------------------------------------------------------------------------------------------------------------------------------------------------------------------------------------------------------|
| Information for ice users                             | <i>"Some more fundamental and specific harm reduction tips regarding danger from pipes, how to prevent spreading blood borne diseases, and vein care."</i>                                                                                                                                                                                                                                                            |
| Information about national and local support services | <i>"Strategies for substance users to make changes - delay, distract etc"<br/>"Locally specific support especially where rehabs are. Maybe a map function that displays 'supports near you'"</i>                                                                                                                                                                                                                      |
| Streamlined navigation                                | <i>"Would love to have more information on specialised doctors."<br/>"I would love there to be a "back" option. I sometimes didn't pay attention to what page I was in and then pressed a button accidentally and struggled to go back to where I was"<br/>"Simplicity is key - show people where to go after making one choice, then give the option to browse the whole app through the menu navigation button"</i> |
| Making the app more interactive                       | <i>"Maybe some more interactive activities to complement the quiz"<br/>"A support feature, i.e. someone you can contact straight away or a support network that is monitored. I.e. somewhere family members, those with a lived experience or those wishing to seek help can chat and support each other."</i>                                                                                                        |
| Lived experience stories                              | <i>"Data base of meth addicts and their journey recovering from meth"</i>                                                                                                                                                                                                                                                                                                                                             |
| Mobile friendly information                           | <i>"Personal stories from ice users and the families"<br/>"Less written information, at first look it just looked like pages and pages of written information"<br/>"It would be useful to have a Frequently Asked Questions section about ice itself (rather than the app). A quick summary of sorts for people who want to skim quickly rather than reading whole sections of text."<br/>"More visuals"</i>          |
